1 **Title**

2 Establishment of a novel method for the production of chimeric mouse embryos using oil  
3 droplets.

4

5 **Authors and affiliation**

6 Hiroyuki Imai<sup>1,\*</sup>, Soichiro Tsuda<sup>2</sup>, Tokuko Iwamori<sup>1</sup>, Etsuro Ono<sup>1</sup>

7 <sup>1</sup>) Department of biomedicine, Graduate School of Medical Science, Kyushu University,

8 3-1-1 Maidashi, Higashi-ku, Fukuoka, 812-8582, Japan

9 <sup>2</sup>) On-chip Biotechnologies Co., Ltd. 2-24-16 Naka-cho, Koganei, Tokyo, 184-0012,

10 Japan

11

12 **Address correspondence**

13 Email: [himai@anim.med.kyushu-u.ac.jp](mailto:himai@anim.med.kyushu-u.ac.jp)

14 Tel: +81 92-642-6159

15 Fax: +81 92-642-6165

16

17 **Keyword (5-10)**

18 Blastocyst, Chimera, Embryo, Embryonic Stem Cell, Droplet, Microfluid

19

20 **Abstract**

21 The production of chimeric animals is frequently necessary for the constructing  
22 genetically modified animals, and has gained popularity in regenerative medicine in the  
23 recent years for the reconstruction of xenogeneic organs. The aggregation method and the  
24 injection method are generally used for producing chimeric mice. In the aggregation  
25 method, the chimeras are produced by co-culturing embryos and stem cells, and keeping  
26 them physically adhered. In the injection method, the chimeras are produced by injecting  
27 stem cells into the zona pellucida using microcapillaries. These methods only focus on  
28 the generation of chimeric animals, and are not expected to produce reproducible results  
29 or allow quantitative evaluation.

30 This study aimed to establish a novel method for producing chimeric embryos via  
31 droplets for improving on the conventional methods that are used for producing chimeric  
32 embryos. In this study, the embryonic stem cells and embryos were successfully isolated  
33 in the droplets, and the emergence of chimeric embryos was confirmed by co-culture for  
34 6 hours. By this method, the control and operability of stem cell numbers can be regulated,  
35 and the method allows better reproducibility and quantification during the production of  
36 chimeric embryos. In addition to the conventional methods for producing chimeric  
37 embryo, the novel method described herein could be employed for the efficient  
38 production of chimeric animals.

39

## 40 **Introduction**

41 The production of chimeric animals is often necessary for the generation of genetically  
42 modified animals, and has gained popularity in the recent years for the reconstruction of  
43 xenogeneic organs (1,2). There are two classical methods for producing chimeric animals,  
44 especially chimeric mice, using pluripotent stem cells, namely, the injection method (3)  
45 and the aggregation method (4). The culture conditions for stem cells have been improved  
46 for the production of chimeric mice, including the use of chemically defined media or 3i  
47 culture system (5, 6, 7). Previous studies have also focused on the number of passages of  
48 stem cell lines and the number and ploidy of the host embryos for improving the methods  
49 used to induce chimerism (8, 9). These studies have helped improve the production  
50 efficiency of transgenic mice that are produced from chimeric mice. However, there are  
51 certain issues with the methods that are currently used for producing chimeric embryos,  
52 namely, the injection method and the aggregation method, which are discussed hereafter.

53 Firstly, in the injection method, chimerism is induced by injecting stem cells into the  
54 zona pellucida using a microcapillary. While certain types of chimerisms can be induced  
55 at different stages of generation (10, 11), it requires the use of expensive tools for  
56 manipulation and precision operators' skills. In particular, as the success of the chimerism  
57 is influenced by the technique of the experimenter, the reproducibility of the experiment  
58 is considered difficult.

59 In the aggregation method, the embryos and stem cells are placed in small indentations  
60 on a petri dish and are allowed to remain adhered for inducing chimerism. This is a  
61 primitive method that can be used to produce chimeric embryos easily and inexpensively.

62 Although several technical improvements have been proposed (12), the resulting chimeric  
63 embryos cannot be subjected to quantitative analysis as it is difficult to control the number  
64 of stem cells. In addition to the aforementioned injection and aggregation methods, a  
65 microaggregation method has also been developed (13), but no other methods are  
66 available for producing chimeric embryos.

67 To this end, this present study aimed to improve on the conventional methods for  
68 producing chimeric embryos. We attempted to apply the zona pellucida reconstruction  
69 method to the production of chimeric embryos. During the reconstruction of the zona  
70 pellucida, we attempted to isolate the cells within the oil droplets using microfluidic  
71 channels. Droplet microfluidics has been employed as an ultrahigh-throughput assay  
72 technology for a wide range of biological applications, including as antibody screening  
73 (14) and single-cell RNA sequencing (15). Water-in-oil (W/O) droplets formed by  
74 microfluidic devices are generally monodispersed, thus allowing the high-throughput  
75 creation of millions of tiny ‘test tubes’ that are represented by the individual droplets.  
76 Typically, the surfactants dissolved in the fluorinated oil stabilize and maintain the W/O  
77 droplets for over a month. In addition, the surfactants are non-toxic to mammalian cells,  
78 and the cells can therefore be cultured for up to two weeks (16). In summary, we  
79 attempted to produce chimeric embryos using the oil droplets and describe the novel  
80 method established in this present study.

81

## 82 **Materials and Methods**

### 83 *Custom chips*

84 The microfluidic droplet generator used in this study was designed on the CAD  
85 software Rhino 6 (McNeel & Associates, USA). A polymer mold was used for fabricating  
86 the droplet generator, which was prepared by using a 3D stereolithography tool (Acculas  
87 SI-C1000, D-MEC, JAPAN) that constructs three-dimensional structures layer-by-layer  
88 with epoxy-based UV curable resin (KC-1257, D-MEC) on a glass substrate. The 3D  
89 polymer mold was developed by using a solvent (EE-4210, Olympus, JAPAN) for at least  
90 30 min to remove the uncured resin. The polymer mold was subsequently rinsed with  
91 ethanol and thoroughly dried on a hotplate at approximately 70°C, following which  
92 parylene C was vapor-deposited on the polymer mold using a parylene coating system  
93 (SCS Labcoater, USA). The droplet generator devices were fabricated with  
94 polydimethylsiloxane (PDMS, Sylgard 184, Toray Dow Corning). The microfluidic  
95 channels in the devices were filled with 2% trichloro silane (Sigma-Aldrich) in HFE7500  
96 (3M, USA). The solution was removed and the devices were baked at 120°C, which  
97 increased the hydrophobicity of the microfluidic channels.

98

### 99 *Cells and embryonic culture*

100 EGFP-expressing mouse ESCs, which have been established and described in the  
101 previous report (17), were cultured in ESGRO medium (Merck) supplemented with  
102 20% KSR (Gibco).

103 All the protocols for the animal experiments were approved by the Animal Care and  
104 Use Committee of Kyushu University (protocol number: A30-304). All the mice were  
105 purchased from Japan SLC, Inc (Hamamatsu, Japan). The embryos were collected from  
106 superovulated B6D2F1 female mice at the 2-cell stage, at 1.5 dpc (days post coitum)  
107 and cultured in M16 medium in an atmosphere of 5% CO<sub>2</sub> in air at 37 °C.

108

#### 109 *Formation of Chimeric embryos*

110 After denuding the embryos at the morula stage with acidic Tyrode's solution  
111 (Sigma) and EGFP-ESCs were transferred to a custom chip, the droplets were generated  
112 using a droplet generator (On-chip Biotechnologies Co., Ltd.) at the sample pressure  
113 and the oil pressure of 8.0 kPa. Fluorinated oil (008-FluoroSurfactant in HFE7500,  
114 RAN Biotech., Inc., MA, USA) was used in combination with surfactants at a  
115 concentration 2.06%. The resulting emulsion was collected in a 0.2 ml PCR tube,  
116 covered with PBS, and cultured in a CO<sub>2</sub> incubator. After mixing the emulsion with an  
117 equal volume of 10% PFO (1H,1H,2H,2H-Perfluoro-1-octanol, Fujifilm, Osaka, Japan)  
118 in HFE7500, embryos were recovered from the droplets, washed with M2 medium, and  
119 subsequently cultured in M16 medium. Cell viability was measured by adding  
120 Propidium Iodide (PI) solution.

121

#### 122 *Statistical analysis*

123 Values of  $P < 0.001$  were considered to be statistically significant in the binominal  
124 tests.

## 125 **Results and Discussion**

### 126 *Encapsulation of mouse ESCs in W/O droplets using microfluidic chips.*

127 The custom microfluidic chips were created by the method previously described in the  
128 Materials and Methods section (Fig. 1A). A highly magnified image of a microfluidic  
129 channel is depicted in Fig. 1B. The width of the channel in the microfluidic chip at the  
130 droplet generation point was 120  $\mu\text{m}$ , and the flow of oil and cell suspension has been  
131 indicated in the figure by black arrows. The droplets were generated at the intersection of  
132 the oil channels and the cell suspension channel (Fig. 1C).

133 EGFP-expressing mouse ESCs, that had been established and described in our  
134 previous study (17) were used. The ESCs expressed EGFP and showed naive-typed  
135 colony morphology (Fig. 2A). After pressurizing the cultured ESCs suspension with the  
136 oil in the custom microfluidic chips, the ESCs were successfully encapsulated and  
137 isolated into the droplets (Fig. 2B). In order to control the number of cells that were  
138 incorporated into each droplet, droplet generation was performed by altering the  
139 concentration of mouse ESCs in the suspension. A 2-fold dilution series of the suspension  
140 was prepared, ranging between  $4.8 \times 10^6$  cell/ml to  $0.075 \times 10^6$  cell/ml. The distribution  
141 of the number of cells isolated in the droplets using smear preparation of the generated  
142 emulsion is depicted in Fig. 2C. The results demonstrated that the cells could be isolated  
143 in half of the droplets at a concentration of  $1.2 \times 10^6$  cell/ml, and in 90% of the droplets  
144 at concentrations of  $2.4 \times 10^6$  cell/ml or higher.

145

### 146 *In-droplet culture of ESCs*

147 In order to determine the period for which the ESCs could be cultured in the droplets,  
148 the survival rate following their in-droplet culture was measured. The generated droplets  
149 were cultured in 0.2 ml PCR tubes by overlaying with PBS to avoid evaporation of the  
150 volatile fluorinated oil (Fig. S1). After culturing the droplet-encapsulated ESCs for 1 and  
151 2 days, it was observed that most of the cells became PI-positive and did not survive (Fig.  
152 S2). The cell viability was therefore subsequently measured 3 hourly for 12 hours, to  
153 reduce the culture period in the droplets to 1 day or less. It was observed that although  
154 the cell viability gradually decreased over the duration of the culturing (Fig. 3A), 75% of  
155 the ESCs survived for 9 hours and 80% survived for 6 hours (Fig. 3B). We therefore  
156 considered a culture time of 6 hours for ensuring a high survival rate in the subsequent  
157 experiments for producing chimeric embryos. Although the cause of cell death in the in-  
158 droplet culture after 1 day was unclear, it could be assumed that the ESCs did not survive  
159 due to cellular auxotrophy. As the auxotrophy of HEK cells and Jurkat cells are different,  
160 the survival rates of these immortalized cell lines in the in-droplet culture could have been  
161 different (16). Mouse ESCs are specifically auxotrophic for substances such as  
162 methionine (18), suggesting that cell death could have been induced by the low nutritive  
163 environment, due to their isolation into microdroplets. By modifying the continued  
164 culture of ESCs within the droplets, the method can be applied to the formation of  
165 embryoid bodies of uniform sizes (19), which might improve the quality of differentiation.  
166

#### 167 *Production of chimeric embryos via droplets*

168 A schematic diagram of the in-droplet cell culture experiment for the formation of the



169 chimeric embryos is depicted in Fig. 4A. The details of the experimental procedures have  
170 been previously described in the Materials and Methods section. By adding the denuded  
171 embryos to the ESCs suspension and pressurizing with custom chips, we succeeded in  
172 isolating the embryos and ESCs into the same droplets (Fig. 4B). Following in-droplet  
173 culture, EGFP-positive cells were detected in morula stage (Fig. 4C). At 3.5 dpc,  
174 blastocysts with EGFP-positive cells in the inner cell mass were observed (Fig. 4D),  
175 indicating that the formation of chimeric embryos via the oil droplet method was  
176 successful. Table 1 enlists the production rate of chimeric embryos for the corresponding  
177 concentrations of ESC suspensions.

178 There are two methods for reconstructing the embryonic zona pellucida, one using  
179 agarose capsules (20) and other using sodium alginate capsules (21). Both methods have  
180 disadvantages, in that they have complicated process of production or inhibition of  
181 embryonic development (22, 23). In this present study, it was observed that a 6-hour  
182 embryonic in-droplet culture produced no effects on the subsequent development of the  
183 embryos. Additionally, the embryos could be easily recovered from the droplets by simply  
184 by adding PFO solution.

185 In this present study, we established the droplet method for producing chimeric  
186 embryos, which is completely different from the conventional injection and aggregation  
187 methods that are used for the generation of chimeric embryos. This method allows a  
188 superior for the production of chimeric embryos, thus contributing to the efficient  
189 production of chimeric animals in the future.

190

191 **Acknowledgements**

192       This work was supported by the 40<sup>th</sup> LNest Grant and the Qdai-jump Research (QR)  
193 Program. The authors are grateful to Dr. Kiyoshi Kano of Yamaguchi University for  
194 providing the mouse ESCs in accordance with Research Results Materials Handling  
195 Regulations of Yamaguchi University.

196

197 **References**

- 198 **1. Wu, J., Platero-Luengo, A., Sakurai, M., Sugawara, A., Gil, MA., Yamauchi, T.,**  
199 **Suzuki, K., Bogliotti, YS., Cuello, C., Morales Valencia, M., and other 27 authors:**  
200 Interspecies chimerism with mammalian pluripotent stem cells. *Cell*, **168**, 473-486  
201 (2017).
- 202 **2. Yamaguchi, T., Sato, H., Kato-Itoh, M., Goto, T., Hara, M., Sanbo, M., Mizuno,**  
203 **N., Kobayashi, T., Yanagida, A., Umino, A., and other 6 authors:** Interspecies  
204 organogenesis generates autologous functional islets. *Nature*, **542**, 191-196 (2017).
- 205 **3. Valenzuela, DM., Murphy, AJ., Frenthewey, D., Gale, NW., Economides, AN.,**  
206 **Auerbach, W., Poueymirou, WT., Adams, NC., Rojas, J., Yasenchak, J., and other**  
207 **16 authors:** High-throughput engineering of the mouse genome coupled with high-  
208 resolution expression analysis. *Nature Biotechnol.*, **21**, 652-659 (2003).
- 209 **4. Wood, SA., Allen, ND., Rossant, J., Auerbach, A., and Nagy, A.:** Non-injection  
210 methods for the production of embryonic stem cell-embryo chimeras. *Nature*, **365**, 87-  
211 89 (1993).
- 212 **5. Cheng, J., Dultra, A., Takesono, A., Garrett-Beal, L., and Schwartzberg, PL.:**  
213 Improved generation of C57BL/6J mouse embryonic stem cells in a defined serum-  
214 free media. *Genesis*, **39**, 100-104 (2004).
- 215 **6. Kiyonari, H., Kaneko, M., Abe, S., and Aizawa, S.:** Three inhibitors of FGF receptor,  
216 ERK and GSK3 establishes germline-competent embryonic stem cells of C57BL/6N  
217 mouse strain with high efficiency and stability. *Genesis*, **48**, 317-327 (2010).
- 218 **7. Yagi, M., Kishigami, S., Tanaka, A., Semi, K., Mizutani, E., Wakayama, S.,**

- 219 **Wakayama, T., Yamamoto, T., and Yamada, Y.:** Derivation of grand-state female  
220 ES cells maintaining gamete-derived DNA methylation. *Nature*, **548**, 224-227 (2017).
- 221 **8. Nagy, A., Rossant, J., Nagy, R., Abramow-Newerly, W., and Roder, J.C.:** Derivation  
222 of completely cell culture-derived mice from early-passage embryonic stem cells. *Proc.*  
223 *Natl. Acad. Sci. USA.*, **90**, 8424-8428 (1993).
- 224 **9. Ohta, H., Sakaide, Y., Yamagata, K., and Wakayama, T.:** Increasing the cell number  
225 of host tetraploid embryos can improve the production of mice derived from  
226 embryonic stem cells. *Biol. Reprod.*, **79**, 486-492 (2008).
- 227 **10. De Repentigny, Y., and Kothary, R.:** Production of mouse chimeras by injection of  
228 embryonic stem cells into the perivitelline space of one-cell stage embryos. *Transgenic*  
229 *Res.*, **19**, 1137-1144 (2010).
- 230 **11. Hu, M., Wei, H., Zhang, J., Bai, Y., Gao, F., Li, L., and Zhang, S.:** Efficient  
231 production of chimeric mice from embryonic stem cells injected into 4- to 8-cell and  
232 blastocyst embryos. *J. Anim. Sci. Biotechnol.*, **4**, 12 (2012).
- 233 **12. Khillan, J.S., and Bao, Y.:** Preparation of animals with a high degree of chimerism  
234 by one-step coculture of embryonic stem cells and preimplantation embryos.  
235 *Biotechniques*, **22**, 544-549 (1997).
- 236 **13. Sumiyama, K., Matsumoto, N., Garcon-Yoshida, J., Ukai, H., Ueda, H.R., and**  
237 **Tanaka, Y.:** Easy and efficient production of completely embryonic-stem-cell-derived  
238 mice using a micro-aggregation device. *PLoS ONE*, **13**, e0203056 (2018).
- 239 **14. Shembekar, N., Hu, H., Eustace, D., and Merten CA.:** Single-cell droplet  
240 microfluidic screening for antibodies specifically binding to target cells. *Cell Rep.*, **22**,

- 241 2206-2215 (2018).
- 242 **15. Macosko, EZ., Basu, A., Satija, R., Nemesh, J., Shekhar, K., Goldman, M., Tirosh,**  
243 **I., Bialas, AR., Kamitaki, N., Martersteck, EM., and other 6 authors:** Highly  
244 parallel genome-wide expression profiling of individual cells using nanoliter droplets.  
245 *Cell*, **161**, 1202-1214 (2015).
- 246 **16. Clausell-Tormos, J., Lieber, D., Baret, JC., El-Harrak, A., Miller, OJ., Frenz, L.,**  
247 **Blouwolff, J., Humphry, KJ., Koster, S., and Duan, H., and other 4 authors:**  
248 Droplet-based microfluidic platforms for the encapsulation and screening of  
249 mammalian cells and multicellular organisms. *Chem. Biol.*, **15**, 427-437 (2008).
- 250 **17. Imai, H., Kano, K., Fujii, W., Takasawa, K., Wakitani, S., Hiyama, M., Nishino,**  
251 **K., Kusakabe, KT., and Kiso, Y.:** Tetraploid embryonic stem cells maintain  
252 pluripotency and differentiation potency into three germ layers. *PLoS ONE*, **10**,  
253 e0130585 (2015).
- 254 **18. Matsuura, K., Kodama, F., Sugiyama, K., Shimizu, T., Hagiwara, N., and Okano,**  
255 **T.:** Elimination of remaining undifferentiated induced pluripotent stem cells in the  
256 process of human cardiac cell sheet fabrication using a methionine-free culture  
257 condition. *Tissue. Eng. Part C Methods*, **21**, 0198 (2015).
- 258 **19. Miyamoto, D., and Nakazawa, K.:** Differentiation of mouse iPS cells is dependent  
259 on embryoid body size in microwell chip culture. *J. Biosci. Bioeng.*, **122**, 507-512  
260 (2016).
- 261 **20. Nagatomo, H., Yao, T., Araki, Y., Mizutani, E., and Wakayama, T.:** Agarose  
262 capsules as a new tool for protecting denuded mouse oocytes/ embryos during

263 handling and freezing-thawing and supporting embryonic development in vivo. *Sci.*  
264 *Rep.*, **7**, 17960 (2017).

265 **21. Yaniz, JL., Santolaria, P., and Lopez-Gatius, F.:** In vitro development of bovine  
266 embryos encapsulated in sodium alginate. *J. Vet. Med. A Physiol. Pathol. Clin. Med.*,  
267 **49**, 393-395 (2002).

268 **22. Westhusion, ME., Slapak, JR., Fuller, DT., and Kraemer, DC.:** Culture of agar-  
269 embedded one and two cell bovine embryos and embryos produced by nuclear transfer  
270 in the sheep and rabbit oviduct. *Theriogenology*, **31**, 271 (1989).

271 **23. Willadsen, SM.:** A method for culture of micromanipulated sheep embryos and its  
272 use to produce monozygotic twins. *Nature*, **227**, 289-300 (1979).

273

274 **Fig. 1 Custom chip and microfluidic channel**

275 (A) Image of custom chip and pressure device; bar = 1 cm.

276 (B) Magnified image of a microfluidic channel on custom chip. The black arrows  
277 indicated the direction of liquid flow; bar = 500  $\mu\text{m}$ .

278 (C) Time-scale representation of the droplets generated on the microfluidic channels.

279

280 **Fig. 2 Isolation of mouse ESCs in the droplets**

281 (A) Morphology and fluorescence imaging of EGFP-expressing mouse ESCs that were  
282 subsequently used for the formation of the chimeric embryos; bar = 100  $\mu\text{m}$ .

283 (B) Mouse ESCs isolated in the droplets. bar = 100  $\mu\text{m}$ .

284 (C) Distribution of the concentrations of mouse ESCs in the suspension and the number  
285 of cells encapsulated in the droplets.

286

287 **Fig. 3 In-droplet culture of mouse ESCs**

288 (A) PI-stained image of the EGFP-expressing mouse ESCs following in-droplet culture.  
289 The suspension prior to droplet generation was used as the control; bar = 100  $\mu\text{m}$ .

290 (B) Cell viability following in-droplet culturing. The number of PI positive cells were  
291 measured and represented the dead cells, while the EGFP-positive cells represented  
292 the living cells; a-d, indicates the significant differences at  $P < 0.001$ .

293

294 **Fig. 4 Formation of mouse chimeric embryos via the oil droplet method**

295 (A) Schematic diagram of the experimental protocol. The morula stage embryos were co-  
296 cultured with EGFP-expressing mouse ESCs within the droplets for 6 hours.

297 (B) The embryos at morula stage and the ESCs can be seen encapsulated in the droplets.  
298 The white arrowhead indicates the embryo at the morula stage, while the black  
299 arrowhead indicates the ESCs; bar = 100  $\mu\text{m}$ .

300 (C) A chimeric embryo recovered from the droplets at 2.75 dpc; bar = 100  $\mu\text{m}$ .

301 (D) Development of the recovered chimeric embryos in (C) into blastocyst stage; bar =  
302 100  $\mu\text{m}$ .

303

304 **Fig. S1 The in-droplet culture method**

305 The droplets were layered on PBS and cultured in PCR tubes (left) with caps half open  
306 or fully open on PCR racks (right).

307

308 **Fig. S2 In-droplet culture of mouse ESCs for 1-2 days**

309 Fluorescent imaging using PI and EGFP after 1-2 days of in-droplet culture. Most of the

310 cells were founded to be PI positive; bar = 100  $\mu$ m.



A

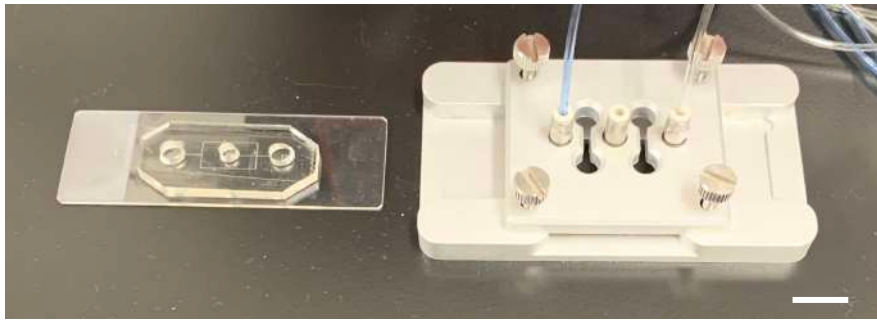

B

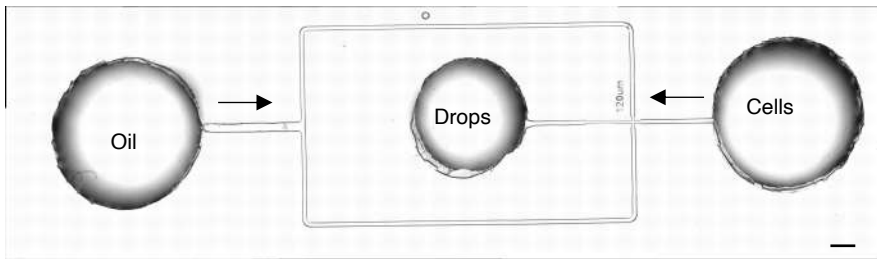

C

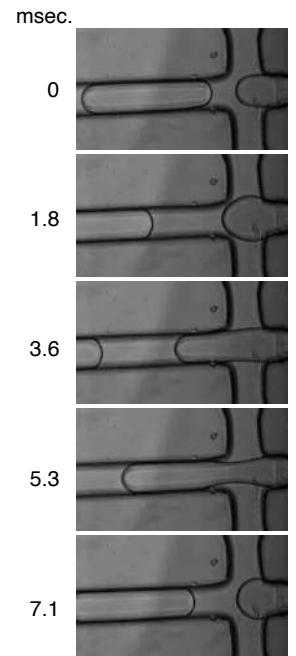

Figure 1

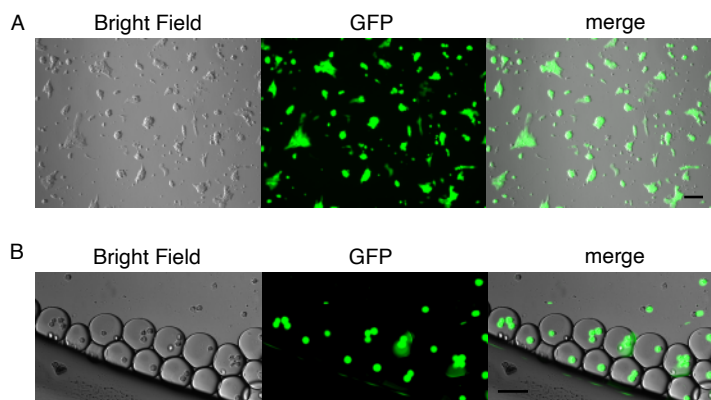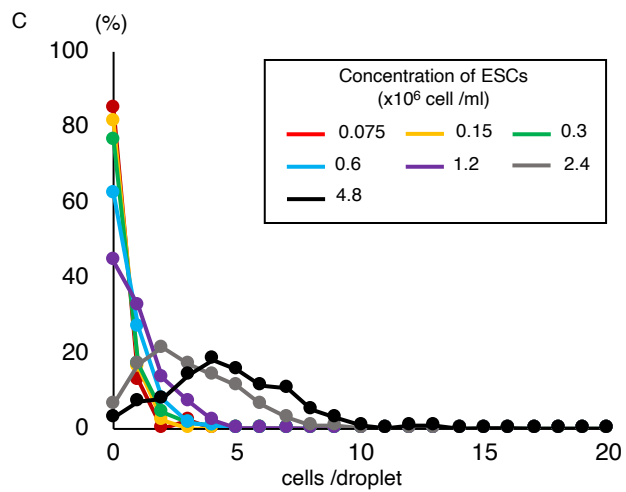

Figure 2

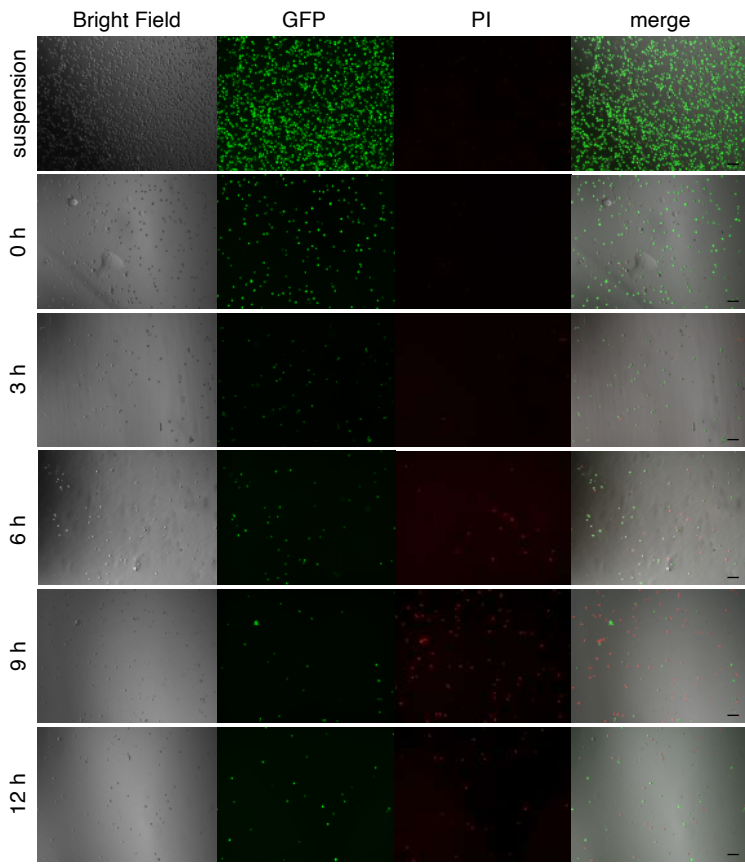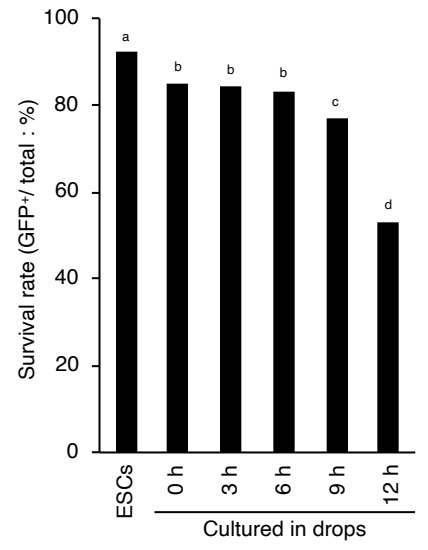

Figure 3

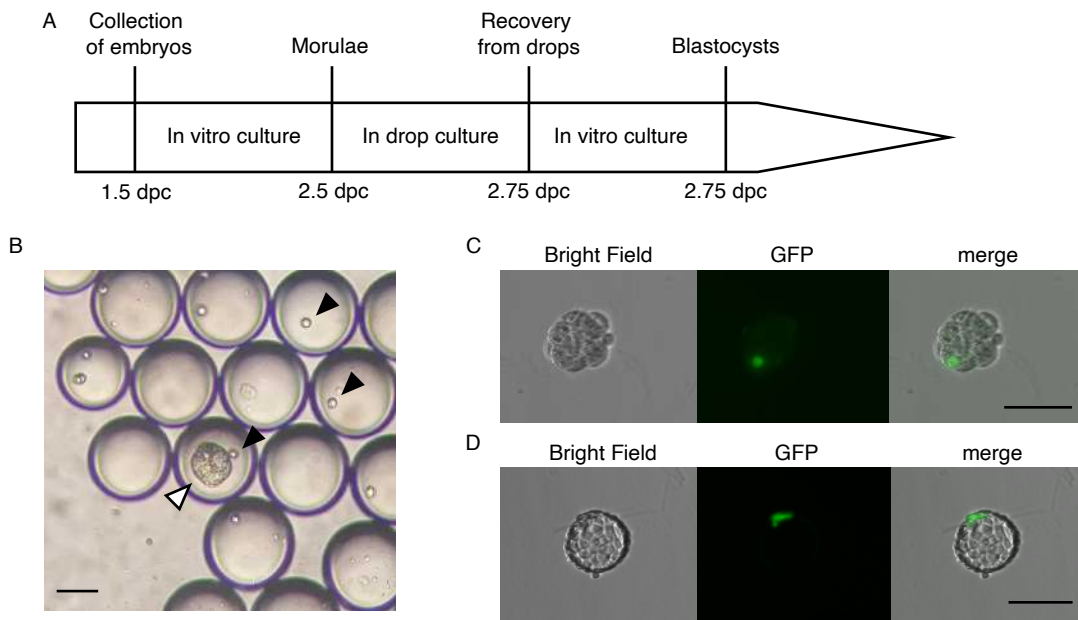

Figure 4

Table 1 Production efficiency of chimeric embryos

| Concentration of ESCs (cell/ml) | Total number of embryos | The number of chimeric blastocysts | chimerism (%)   |
|---------------------------------|-------------------------|------------------------------------|-----------------|
| $1.2 \times 10^6$               | 34                      | 9                                  | 26 <sup>a</sup> |
| $2.4 \times 10^6$               | 64                      | 44                                 | 69 <sup>b</sup> |
| $4.8 \times 10^6$               | 93                      | 82                                 | 88 <sup>c</sup> |

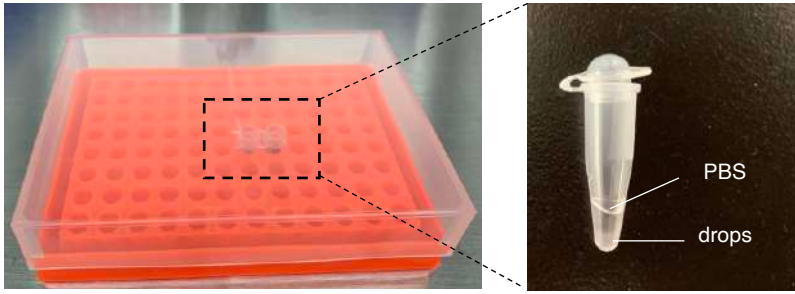

Figure S1

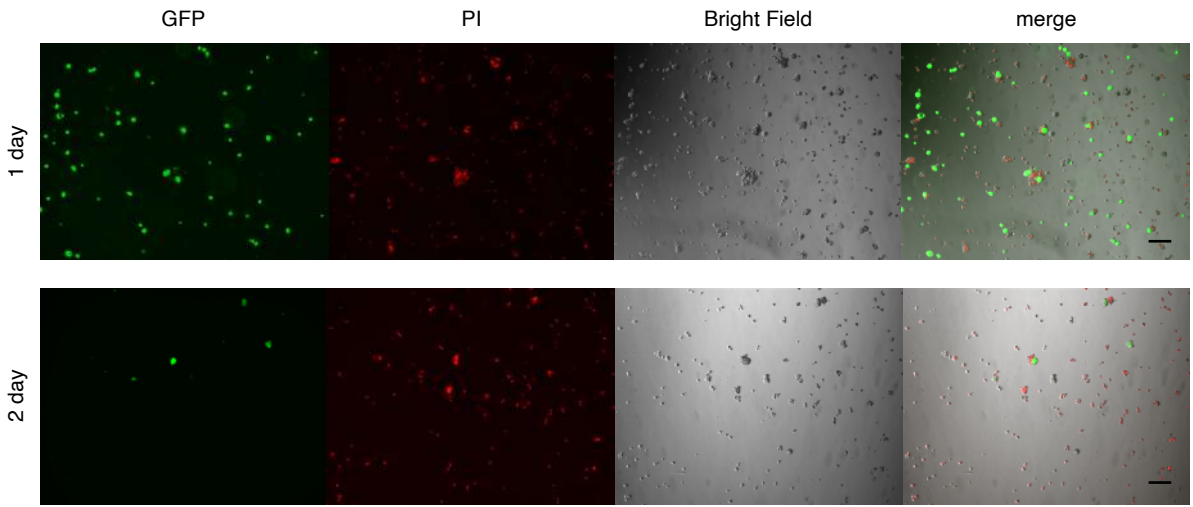

Figure S2
